# Supplementary material for: Sleep Indices and Cardiac Autonomic Activity Responses during an International Tournament in a Youth National Soccer Team
Source: MDPI journal article supplement (doi:10.3390/ijerph18042076), 2021-02-20

## Supplement file 2.

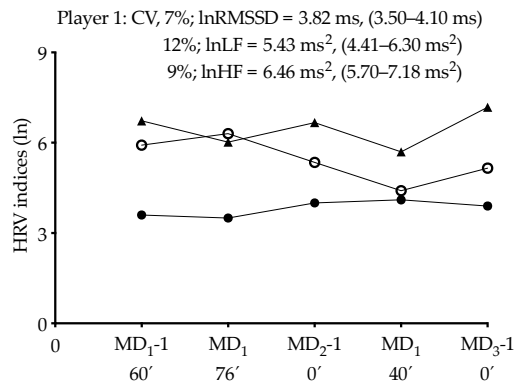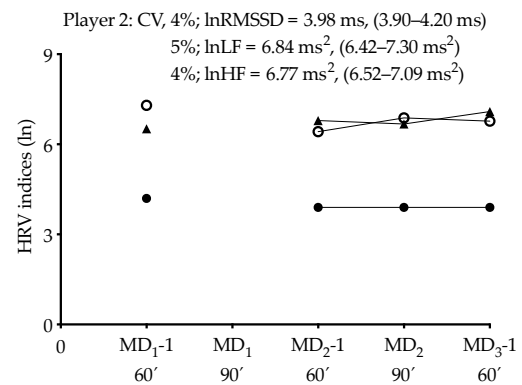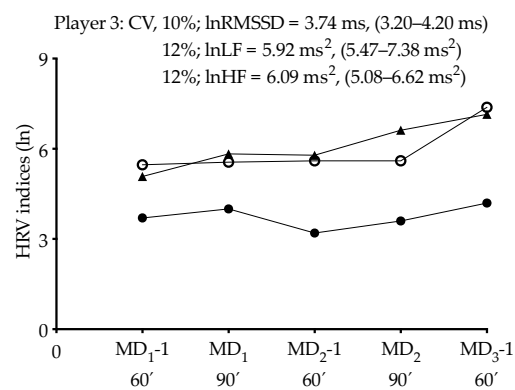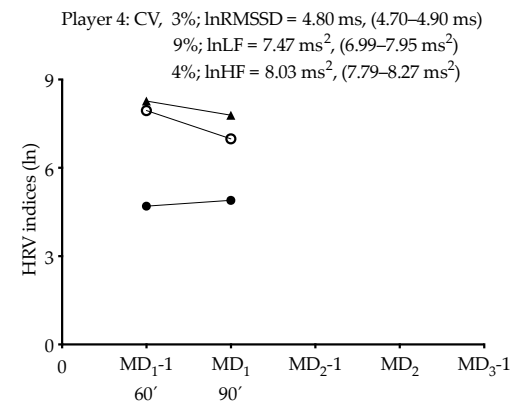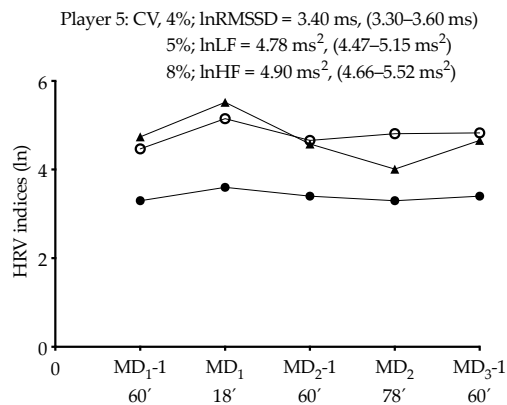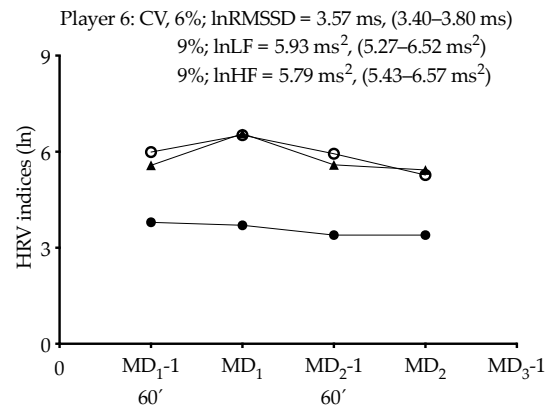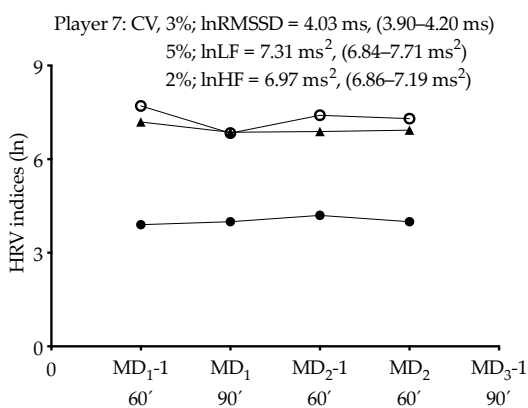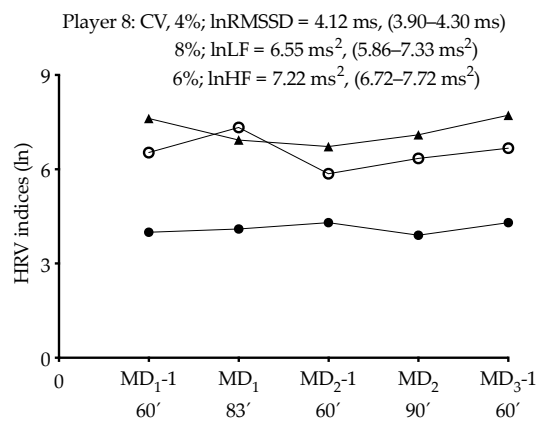

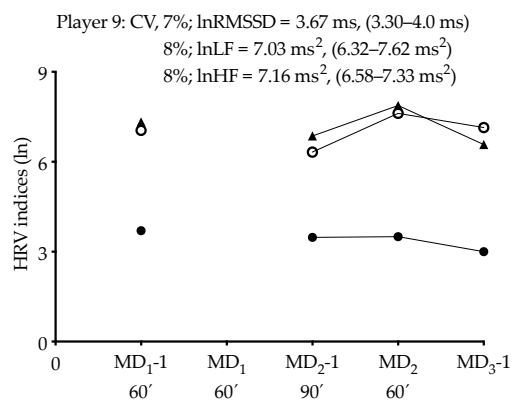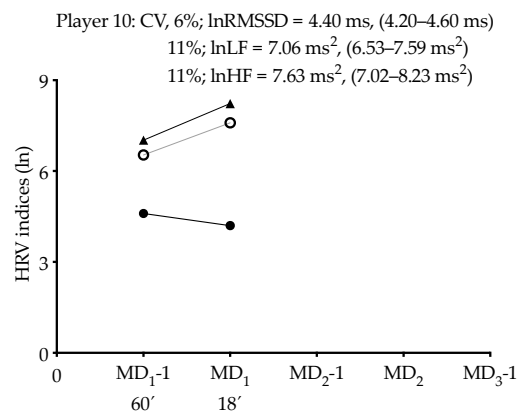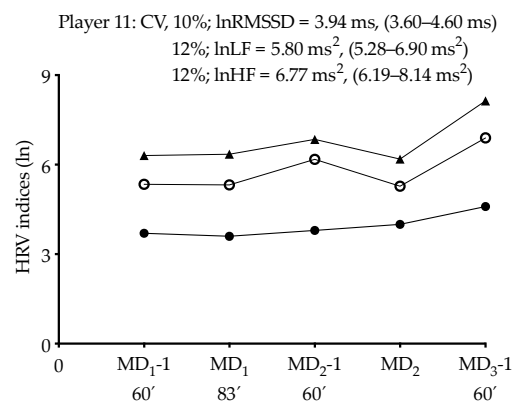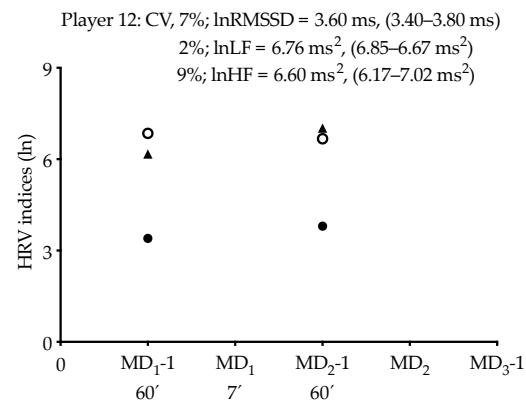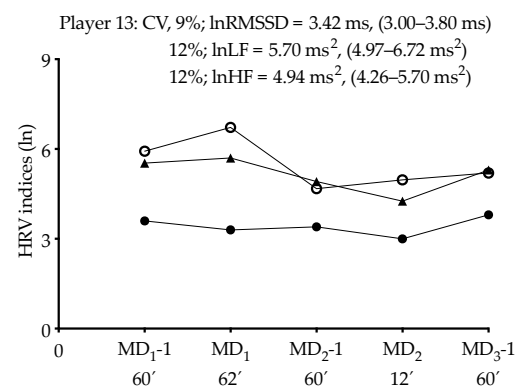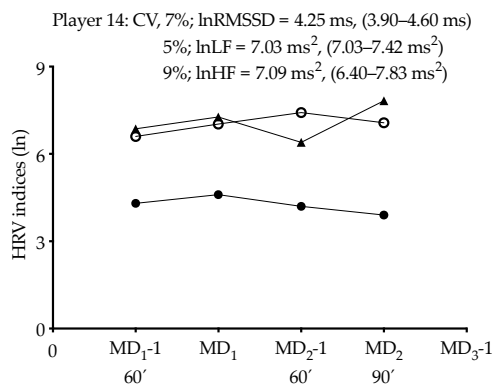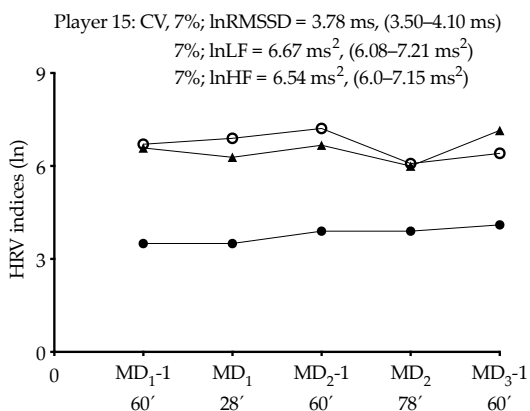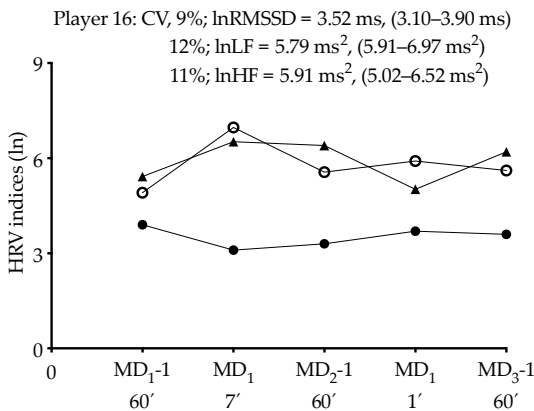

Player 17: CV, 8%; lnRMSSD = 3.58 ms, (3.10–3.90 ms)  
 11%; lnLF = 5.96 ms<sup>2</sup>, (5.61–7.10 ms<sup>2</sup>)  
 12%; lnHF = 5.39 ms<sup>2</sup>, (4.81–6.21 ms<sup>2</sup>)

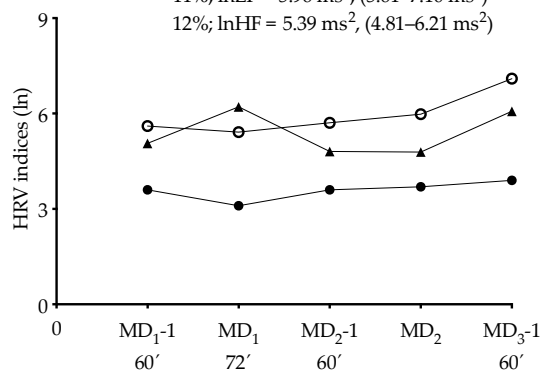

Player 18: CV, 9%; lnRMSSD = 3.83 ms, (3.40–4.20 ms)  
 6%; lnLF = 5.27 ms<sup>2</sup>, (4.92–5.59 ms<sup>2</sup>)  
 8%; lnHF = 6.75 ms<sup>2</sup>, (6.03–7.30 ms<sup>2</sup>)

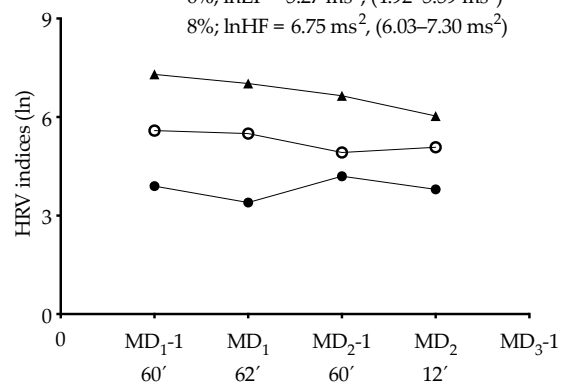

Supplement: s1 [file s1]
