# Supplementary figures and images for: Sleep Indices and Cardiac Autonomic Activity Responses during an International Tournament in a Youth National Soccer Team
Source: MDPI journal article supplement (doi:10.3390/ijerph18042076), 2021-02-20

## Supplement file 1.

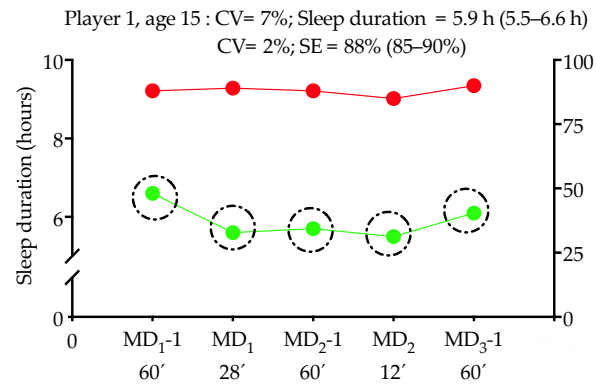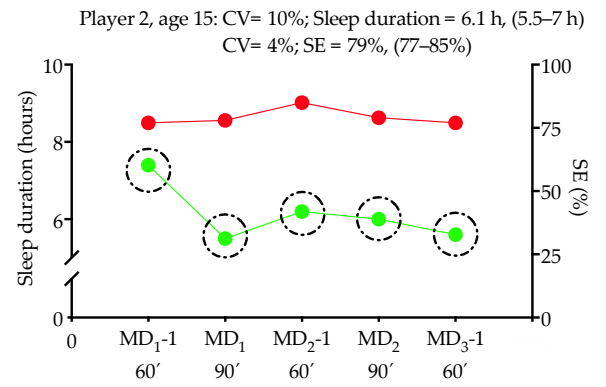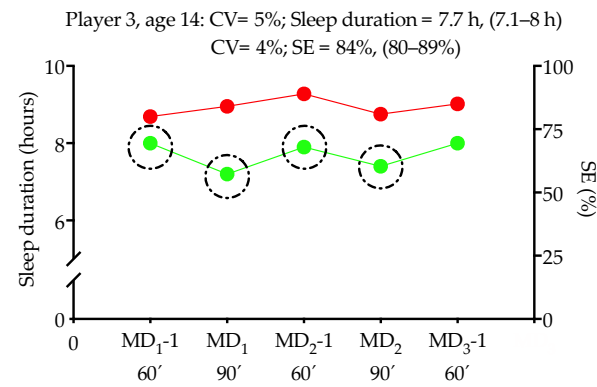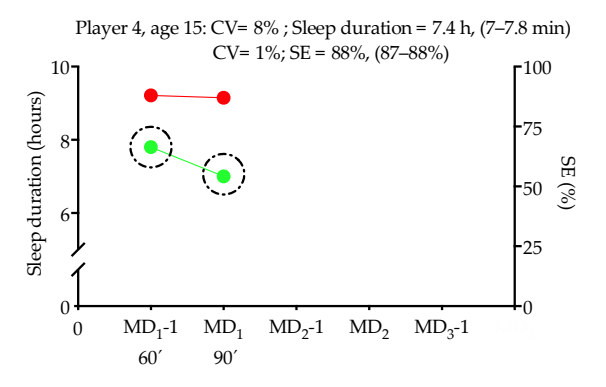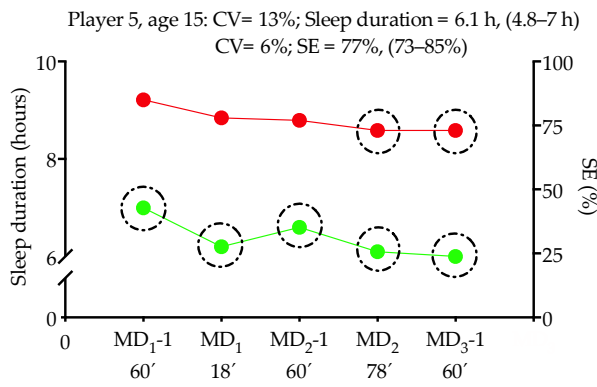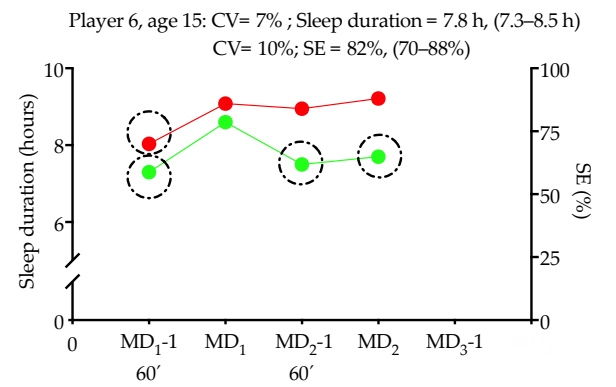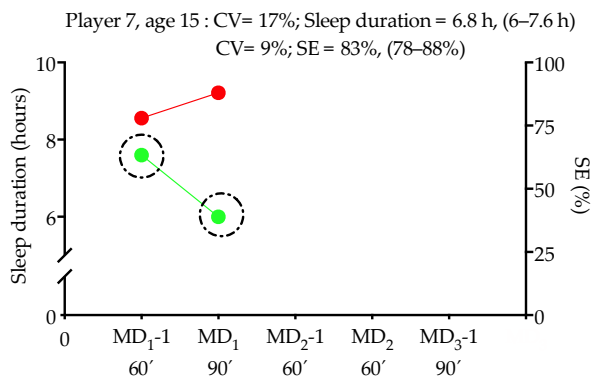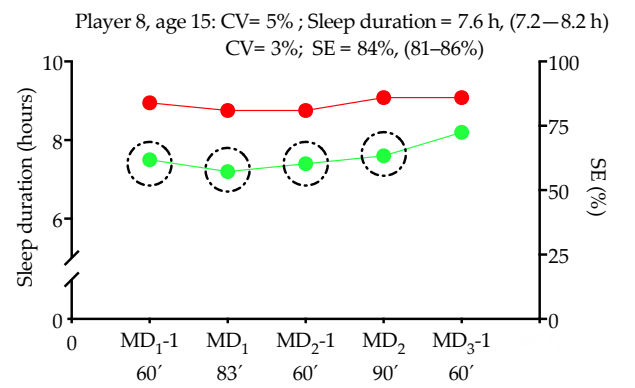

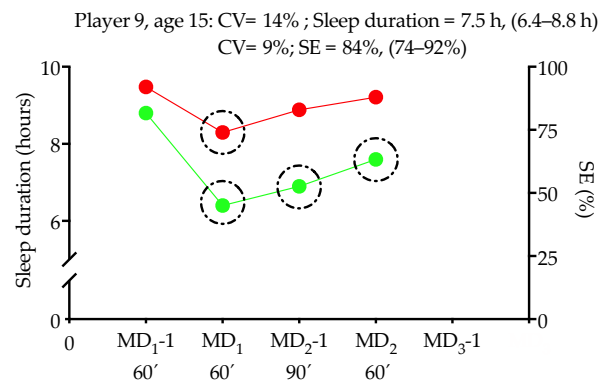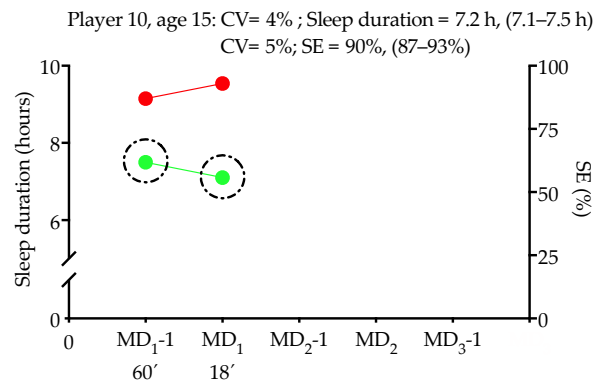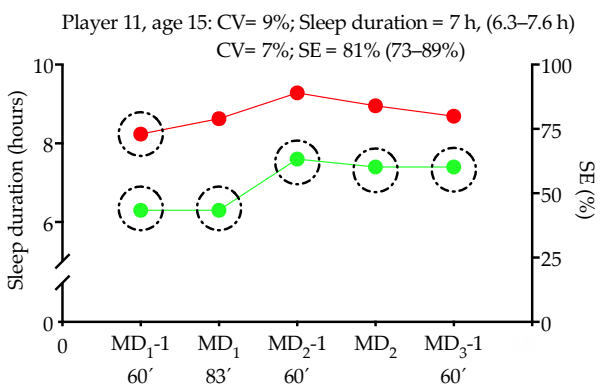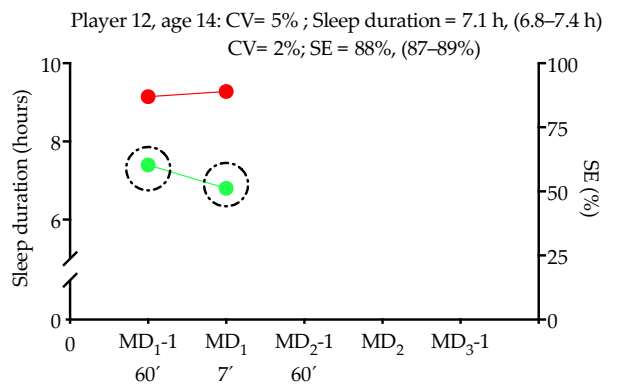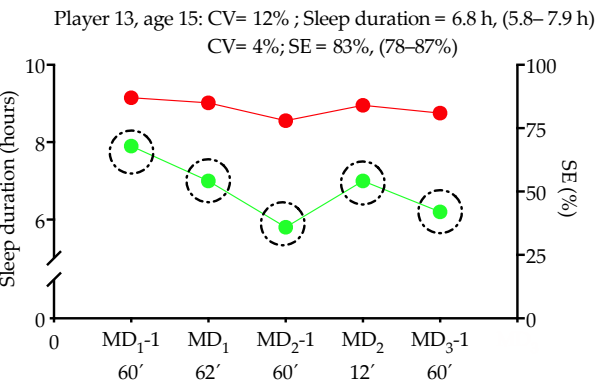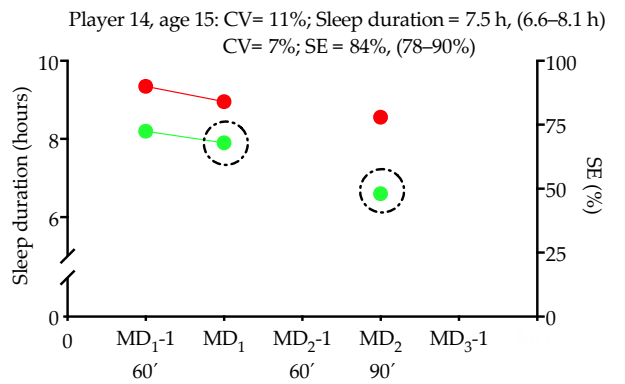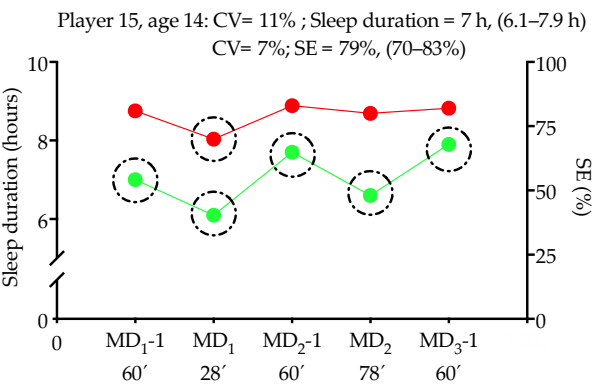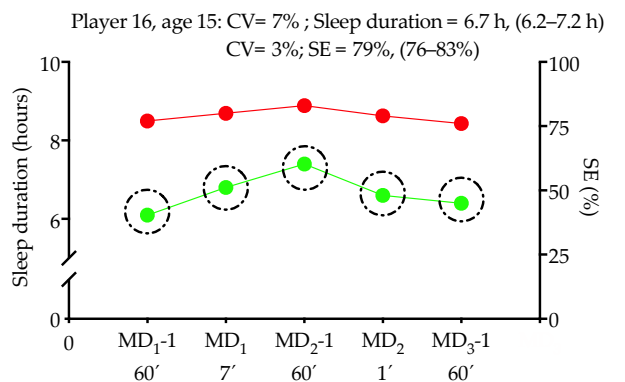

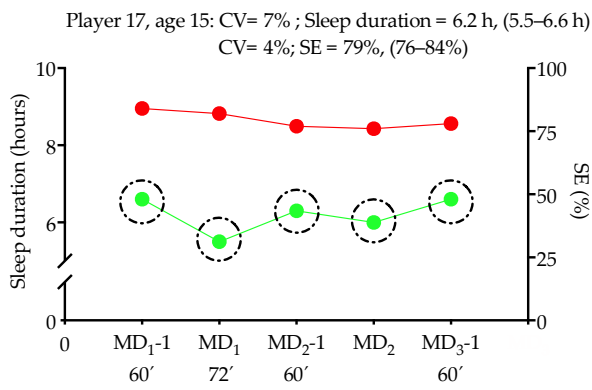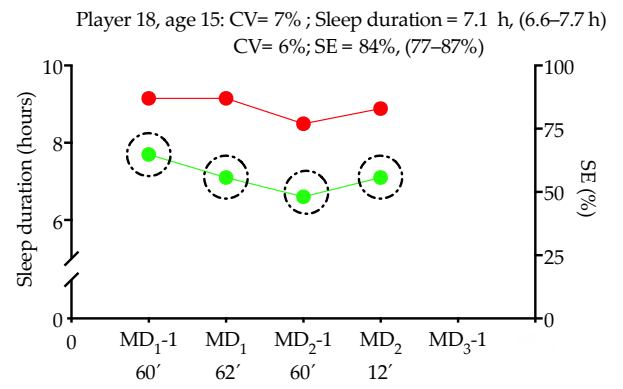

Supplement: s1 [file s1]
